# Supplementary material for: Quantifying alkane emissions in the Eagle Ford Shale using boundary layer enhancement
Source: Copernicus journal article supplement (doi:10.5194/acp-17-11163-2017), 2017-09-20
Supplement: Supplementary file 1 [file table_s2.xlsx]

## Sheet: Sheet1
	ALKANES (all mixing ratios in ppbV)																								METEOROLOGY								PRODUCTION			ALKANE EMISSION RATES
Date	Ethane Floresville		Ethane Oak Park		Enhancement		Propane Floresville		Propane Oak Park		Enhancement		nButane Floresville		nButane Oak Park		Enhancement		Isobutane Floresville		Isobutane Oak Park		Enhancement		Planetary Boundary Layer Height (m agl)		Temperature (°C)		U wind (m/s)		V wind (m/s)		Width of upwind production area (km)	Upwind area (square km)	Upwind natural gas production - July 2013 to December 2015 ( x 10^9 cubic meters)	Methane Emissions				Ethane Emissions				Propane Emissions				n-Butane Emissions
yyyy-mm-dd	MR	Unc.	MR	Unc.	MR	Unc.	MR	Unc.	MR	Unc.	MR	Unc.	MR	Unc.	MR	Unc.	MR	Unc.	MR	Unc.	MR	Unc.	MR	Unc.	Mean	St. Dev.	Mean	St. Dev.	Mean	St. Dev.	Mean	St. Dev.				Enhancement (ppb, median and IQR)	Fraction from RNG (%)	Emissions from RNG	Total Emissions	Enhancement (ppb, median and IQR)	Fraction from RNG (%)	Emissions from RNG	Total Emissions	Enhancement (ppb, median and IQR)	Fraction from RNG (%)	Emissions from RNG	Total Emissions	Enhancement (ppb, median and IQR)	Fraction from RNG (%)
																																						x 10^3 kg per day (median and IQR)				x 10^3 kg per day (median and IQR)				x 10^3 kg per day (median and IQR)
2013-08-02	3.57	0.21	0.79	0.05	2.79	0.25	2.18	0.13	0.29	0.02	1.89	0.14	1.06	0.06	0.13	0.01	0.93	0.07	0.54	0.03	0.11	0.01	0.43	0.04	2190	500	30.39	0.95	-1.23	0.30	3.56	0.21	76.3	41364.40	33.455	12.08 (8.34 - 18.98)	87.43 (76.51 - 97.70)	214.91 (113.98 - 395.27)	263.42 (160.45 - 433.77)	2.79 (2.64 - 2.93)	54.24 (38.32 - 72.04)	60.05 (35.87 - 90.22)	115.37 (91.08 - 140.55)	1.89 (1.80 - 1.98)	24.25 (9.99 - 50.73)	26.42 (10.16 - 57.58)	114.93 (90.83 - 139.72)	0.93 (0.89 - 0.97)	12.99 (6.64 - 24.19)
2013-08-03	3.00	0.17	0.63	0.04	2.37	0.21	1.84	0.11	0.11	0.01	1.73	0.11	0.98	0.06	0.07	0.00	0.92	0.06	0.48	0.03	0.05	0.00	0.43	0.03	2044	500	29.84	1.00	-2.16	0.48	3.43	0.16	56.6	33897.32	28.253	9.38 (6.42 - 14.58)	83.71 (70.84 - 95.56)	142.12 (71.01 - 267.00)	184.64 (110.63 - 303.93)	2.37 (2.25 - 2.49)	47.32 (30.95 - 64.37)	39.80 (22.21 - 61.73)	88.75 (69.69 - 108.69)	1.73 (1.66 - 1.80)	19.23 (7.41 - 41.08)	17.32 (6.25 - 38.70)	95.17 (74.84 - 116.27)	0.92 (0.88 - 0.96)	9.59 (4.62 - 18.21)
2013-08-06	3.03	0.18	0.78	0.05	2.25	0.22	1.75	0.10	0.19	0.01	1.56	0.11	0.88	0.05	0.11	0.01	0.77	0.06	0.47	0.03	0.07	0.00	0.41	0.03	2254	500	32.03	0.97	-1.52	0.45	7.25	0.60	78.8	80284.54	34.511	9.51 (6.53 - 14.93)	86.41 (74.93 - 97.13)	297.82 (152.89 - 554.72)	371.68 (222.04 - 615.66)	2.25 (2.13 - 2.38)	52.21 (36.01 - 69.83)	83.37 (47.87 - 127.60)	168.11 (130.62 - 206.25)	1.56 (1.49 - 1.63)	22.65 (9.14 - 47.71)	36.37 (13.58 - 80.53)	171.23 (133.31 - 209.58)	0.77 (0.73 - 0.80)	12.12 (6.07 - 22.78)
2013-08-07	4.07	0.24	0.96	0.06	3.12	0.29	2.54	0.15	0.22	0.01	2.32	0.16	1.23	0.07	0.13	0.01	1.10	0.08	0.64	0.04	0.11	0.01	0.54	0.04	2014	500	32.20	1.09	-0.36	0.64	8.53	0.53	95.9	86220.60	40.956	12.04 (8.16 - 18.68)	82.60 (69.09 - 94.98)	344.01 (163.39 - 658.74)	455.81 (264.60 - 759.92)	3.12 (2.95 - 3.28)	45.45 (28.67 - 62.42)	96.12 (50.65 - 153.37)	225.42 (172.94 - 281.28)	2.32 (2.22 - 2.42)	17.96 (6.70 - 38.78)	41.46 (14.22 - 94.63)	246.29 (189.30 - 306.57)	1.10 (1.05 - 1.15)	10.06 (4.71 - 19.27)
2013-08-08	3.03	0.18	0.83	0.05	2.20	0.22	1.88	0.11	0.35	0.02	1.53	0.13	1.05	0.06	0.12	0.01	0.93	0.07	0.50	0.03	0.11	0.01	0.39	0.04	2073	500	31.64	1.08	-2.41	0.61	6.82	0.38	81.2	66612.80	35.684	9.20 (6.28 - 14.43)	86.15 (74.33 - 97.04)	310.78 (155.42 - 584.59)	390.29 (228.61 - 651.01)	2.20 (2.07 - 2.32)	51.66 (35.07 - 69.40)	87.05 (48.41 - 135.16)	178.25 (136.82 - 221.03)	1.53 (1.46 - 1.61)	22.16 (8.80 - 47.05)	37.78 (13.72 - 84.60)	182.55 (140.27 - 225.96)	0.93 (0.89 - 0.97)	9.59 (4.74 - 18.13)
2013-08-13	3.86	0.22	0.75	0.04	3.11	0.27	2.27	0.13	0.23	0.01	2.04	0.14	1.06	0.06	0.23	0.01	0.83	0.07	0.52	0.03	0.11	0.01	0.41	0.04	2232	500	30.47	0.80	-0.53	0.55	5.86	0.43	103.3	46763.26	41.437	13.99 (9.71 - 22.04)	88.82 (78.70 - 98.51)	395.82 (215.61 - 726.20)	474.97 (291.33 - 787.44)	3.11 (2.96 - 3.27)	57.19 (41.68 - 75.28)	110.15 (68.13 - 164.81)	198.83 (156.47 - 244.70)	2.04 (1.95 - 2.13)	26.69 (11.32 - 55.33)	48.98 (19.56 - 106.12)	191.51 (150.94 - 235.41)	0.83 (0.79 - 0.87)	17.18 (8.98 - 31.83)
2013-08-31	6.22	0.36	1.57	0.09	4.65	0.45	3.66	0.21	0.22	0.01	3.44	0.22	1.74	0.10	0.08	0.00	1.66	0.11	0.91	0.05	0.06	0.00	0.86	0.06	2204	500	29.10	0.93	-0.73	0.45	2.31	0.13	199.1	65135.50	56.057	18.14 (12.30 - 28.24)	82.99 (69.65 - 95.23)	486.66 (235.05 - 933.36)	640.08 (373.06 - 1073.95)	4.65 (4.40 - 4.91)	46.08 (29.29 - 63.18)	135.45 (72.80 - 216.88)	311.29 (237.65 - 393.48)	3.44 (3.30 - 3.58)	18.39 (6.89 - 39.62)	59.03 (20.64 - 134.36)	338.04 (258.76 - 426.22)	1.66 (1.59 - 1.73)	10.09 (4.73 - 19.33)
2013-09-26	5.02	0.29	2.66	0.15	2.36	0.45	2.68	0.16	0.67	0.04	2.00	0.19	1.20	0.07	0.15	0.01	1.05	0.08	0.71	0.04	0.10	0.01	0.61	0.05	1943	500	27.89	0.62	-2.18	0.17	3.13	0.12	113.2	35294.04	36.575	7.32 (3.95 - 11.92)	74.25 (50.65 - 92.14)	159.31 (28.44 - 361.24)	256.53 (118.15 - 454.67)	2.36 (2.14 - 2.58)	30.45 (7.37 - 50.14)	44.40 (8.65 - 87.85)	163.47 (124.15 - 204.27)	2.00 (1.90 - 2.11)	9.64 (1.08 - 25.49)	17.88 (1.75 - 50.17)	206.16 (158.45 - 253.02)	1.05 (1.00 - 1.10)	5.09 (0.90 - 11.64)
2013-11-16	4.50	0.26	1.62	0.09	2.88	0.35	2.48	0.14	0.40	0.02	2.08	0.17	1.31	0.08	0.46	0.03	0.85	0.10	0.64	0.04	0.23	0.01	0.41	0.05	1349	500	22.89	0.62	-0.41	0.47	6.22	0.34	76.3	67284.30	35.268	11.57 (7.74 - 18.20)	84.39 (71.35 - 96.09)	137.22 (56.99 - 275.33)	179.48 (90.69 - 315.77)	2.88 (2.70 - 3.07)	48.37 (30.96 - 66.14)	38.28 (17.37 - 65.21)	87.22 (60.04 - 115.82)	2.08 (1.98 - 2.18)	19.78 (7.40 - 42.81)	16.22 (4.85 - 39.08)	92.55 (63.97 - 122.49)	0.85 (0.79 - 0.90)	12.88 (6.03 - 24.85)
2013-12-18	8.61	0.50	4.95	0.29	3.66	0.79	4.97	0.29	2.29	0.13	2.68	0.42	1.86	0.11	0.95	0.06	0.91	0.16	0.98	0.06	0.61	0.04	0.37	0.09	2286	500	16.17	0.54	1.72	1.16	5.27	0.56	66.5	38060.62	26.576	14.15 (8.32 - 23.29)	84.25 (67.82 - 96.92)	35.24 (-16.79 - 138.65)	54.14 (-18.10 - 169.03)	3.65 (3.27 - 4.04)	46.13 (22.63 - 67.07)	9.37 (-3.33 - 34.15)	33.44 (-1.37 - 71.75)	2.68 (2.46 - 2.89)	17.76 (4.70 - 42.44)	3.57 (-1.88 - 17.95)	36.36 (-1.50 - 77.53)	0.91 (0.83 - 0.99)	14.09 (4.96 - 29.48)
2013-12-19	5.39	0.31	2.07	0.12	3.31	0.43	3.16	0.18	0.64	0.04	2.52	0.22	1.46	0.08	0.59	0.03	0.88	0.12	0.76	0.04	0.21	0.01	0.55	0.06	2222	500	19.21	0.23	0.17	0.46	9.03	0.21	157.7	159978.16	92.211	12.36 (8.05 - 19.40)	81.31 (66.06 - 94.44)	577.97 (257.29 - 1119.10)	781.72 (451.28 - 1298.71)	3.31 (3.09 - 3.54)	43.01 (24.47 - 60.81)	162.23 (79.04 - 262.86)	400.82 (317.12 - 488.99)	2.52 (2.39 - 2.65)	16.32 (5.40 - 36.46)	69.07 (21.71 - 160.53)	448.73 (356.73 - 543.90)	0.88 (0.81 - 0.94)	12.57 (5.29 - 24.90)
2013-12-20	6.20	0.36	2.15	0.12	4.05	0.48	3.40	0.20	0.64	0.04	2.76	0.23	1.52	0.09	0.82	0.05	0.71	0.14	0.76	0.04	0.32	0.02	0.44	0.06	1627	500	22.45	0.57	0.17	0.19	9.25	1.07	113.2	126940.36	61.949	17.36 (11.75 - 27.41)	87.10 (75.61 - 97.60)	482.57 (222.31 - 936.17)	602.27 (322.43 - 1040.70)	4.05 (3.79 - 4.30)	53.40 (36.58 - 71.64)	134.79 (68.28 - 219.14)	271.72 (193.83 - 352.43)	2.77 (2.63 - 2.90)	23.48 (9.34 - 49.93)	57.93 (19.27 - 134.32)	273.20 (195.21 - 352.82)	0.71 (0.64 - 0.77)	24.45 (11.96 - 46.68)
2014-02-01	7.17	0.42	3.25	0.19	3.92	0.60	4.52	0.26	1.23	0.07	3.29	0.33	1.93	0.11	0.78	0.04	1.15	0.16	0.97	0.06	0.36	0.02	0.61	0.08	1505	500	22.28	0.62	-0.35	0.30	9.28	1.38	192.2	161750.92	104.266	12.40 (7.22 - 19.77)	74.39 (52.63 - 91.54)	452.17 (90.47 - 1044.28)	729.86 (313.96 - 1335.66)	3.92 (3.61 - 4.23)	31.91 (10.45 - 50.63)	125.40 (27.27 - 254.06)	464.98 (320.38 - 618.32)	3.29 (3.11 - 3.48)	10.34 (1.79 - 26.09)	50.92 (6.17 - 144.03)	576.31 (399.08 - 761.06)	1.15 (1.07 - 1.23)	8.11 (2.02 - 17.82)
2014-02-18	7.53	0.44	2.91	0.17	4.63	0.61	3.89	0.23	0.77	0.04	3.12	0.27	1.48	0.09	0.48	0.03	1.00	0.11	0.73	0.04	0.28	0.02	0.45	0.06	1637	500	22.53	0.85	1.03	0.49	9.02	0.78	123.1	71367.02	54.231	20.11 (13.55 - 31.92)	87.68 (76.38 - 97.97)	473.17 (219.55 - 921.33)	584.09 (313.48 - 1019.01)	4.63 (4.31 - 4.95)	54.59 (37.55 - 73.02)	131.67 (67.51 - 215.64)	257.61 (183.51 - 338.82)	3.12 (2.97 - 3.28)	24.32 (9.68 - 51.63)	56.93 (19.30 - 131.73)	255.78 (182.88 - 334.59)	1.00 (0.94 - 1.06)	20.01 (9.85 - 37.95)
2014-02-19	5.70	0.33	2.54	0.15	3.16	0.48	3.06	0.18	0.57	0.03	2.50	0.21	1.30	0.08	0.49	0.03	0.81	0.10	0.69	0.04	0.29	0.02	0.40	0.06	1448	500	23.14	1.08	-0.01	0.62	7.56	0.81	71.4	72790.60	29.708	11.08 (6.88 - 17.53)	78.78 (61.10 - 93.30)	120.48 (35.71 - 265.39)	176.46 (78.72 - 324.27)	3.16 (2.91 - 3.40)	38.73 (18.70 - 56.93)	33.39 (10.69 - 64.06)	100.27 (66.68 - 137.29)	2.50 (2.37 - 2.62)	13.79 (3.81 - 32.20)	13.87 (2.80 - 36.88)	117.16 (78.28 - 159.09)	0.81 (0.75 - 0.86)	11.53 (4.15 - 23.75)
2014-04-11	6.78	0.39	2.33	0.14	4.45	0.53	3.29	0.19	0.43	0.03	2.85	0.22	1.54	0.09	0.25	0.01	1.29	0.10	0.74	0.04	0.17	0.01	0.57	0.05	1621	500	23.18	1.43	-2.32	0.33	6.94	0.30	91.1	75288.58	37.487	20.41 (13.95 - 32.37)	89.67 (79.70 - 99.02)	642.48 (317.98 - 1210.53)	768.92 (428.88 - 1309.26)	4.45 (4.17 - 4.73)	58.97 (42.84 - 77.67)	180.05 (98.98 - 280.68)	323.59 (235.99 - 411.21)	2.85 (2.72 - 2.98)	28.03 (11.75 - 58.48)	77.95 (27.96 - 174.87)	305.64 (223.47 - 386.34)	1.29 (1.23 - 1.35)	16.33 (8.44 - 30.38)
2014-05-05	5.13	0.30	2.96	0.17	2.17	0.47	2.35	0.14	0.59	0.03	1.76	0.17	0.97	0.06	0.18	0.01	0.79	0.07	0.50	0.03	0.14	0.01	0.36	0.04	2461	500	26.52	1.18	0.30	0.66	9.88	0.52	132.9	169620.90	81.088	7.21 (3.93 - 11.88)	77.89 (56.64 - 93.96)	299.95 (77.53 - 646.83)	442.16 (219.42 - 776.14)	2.17 (1.93 - 2.40)	35.28 (11.21 - 55.49)	84.02 (23.16 - 156.14)	254.18 (199.51 - 315.63)	1.76 (1.66 - 1.85)	11.79 (1.91 - 30.07)	34.26 (5.40 - 90.41)	306.28 (245.67 - 371.51)	0.79 (0.75 - 0.83)	7.21 (1.68 - 16.03)
2014-05-17	3.94	0.23	2.07	0.12	1.87	0.35	1.59	0.09	0.26	0.02	1.33	0.11	0.67	0.04	0.13	0.01	0.54	0.05	0.36	0.02	0.11	0.01	0.26	0.03	1088	500	21.06	1.06	-2.55	0.60	8.77	0.52	56.6	46414.08	25.292	7.53 (4.75 - 12.12)	85.05 (71.17 - 96.75)	104.66 (33.30 - 224.90)	137.91 (57.63 - 257.30)	1.87 (1.69 - 2.04)	48.97 (29.07 - 68.00)	29.20 (9.97 - 54.33)	68.71 (43.13 - 95.11)	1.33 (1.27 - 1.39)	19.86 (6.66 - 44.42)	12.05 (2.66 - 31.42)	72.86 (46.09 - 99.50)	0.54 (0.51 - 0.56)	13.15 (5.58 - 26.11)
2014-06-22	4.18	0.24	0.87	0.05	3.31	0.29	2.45	0.14	0.14	0.01	2.32	0.15	1.21	0.07	0.11	0.01	1.10	0.08	0.61	0.04	0.09	0.01	0.52	0.04	1933	500	27.53	1.02	-2.45	0.21	8.66	0.48	73.8	36610.18	28.248	13.82 (9.52 - 21.58)	85.91 (74.30 - 96.86)	454.27 (213.62 - 866.67)	577.27 (316.06 - 974.05)	3.31 (3.14 - 3.47)	51.29 (35.33 - 68.68)	127.54 (66.10 - 202.62)	269.02 (193.79 - 341.56)	2.32 (2.22 - 2.41)	22.05 (8.91 - 46.37)	54.66 (18.48 - 124.83)	276.82 (199.67 - 350.75)	1.10 (1.05 - 1.15)	12.20 (6.12 - 22.88)
2014-06-23	2.74	0.16	0.90	0.05	1.84	0.21	1.46	0.08	0.09	0.01	1.37	0.09	0.82	0.05	0.11	0.01	0.71	0.05	0.42	0.02	0.07	0.00	0.36	0.03	2203	500	28.30	0.83	-2.23	0.45	7.79	0.54	49.2	24093.42	20.946	7.11 (4.76 - 11.11)	82.62 (68.79 - 95.03)	151.94 (70.66 - 291.32)	201.71 (116.18 - 335.08)	1.84 (1.73 - 1.96)	45.40 (28.08 - 62.67)	42.60 (21.81 - 68.10)	100.62 (77.74 - 123.74)	1.37 (1.31 - 1.43)	17.88 (6.50 - 38.89)	18.30 (6.10 - 41.87)	110.22 (85.47 - 134.76)	0.71 (0.68 - 0.74)	9.20 (4.19 - 17.78)
2014-06-29	2.24	0.13	0.91	0.05	1.33	0.18	1.14	0.07	0.16	0.01	0.98	0.08	0.62	0.04	0.13	0.01	0.49	0.04	0.31	0.02	0.12	0.01	0.19	0.03	1504	500	28.13	0.75	-5.02	0.52	10.60	0.42	34.4	27424.06	17.853	5.20 (3.42 - 8.21)	83.41 (69.50 - 95.57)	92.77 (39.08 - 183.57)	122.91 (64.91 - 210.97)	1.33 (1.24 - 1.42)	46.55 (28.42 - 64.41)	25.97 (11.93 - 43.50)	61.34 (44.40 - 78.34)	0.98 (0.93 - 1.02)	18.52 (6.55 - 40.59)	11.02 (3.32 - 26.17)	66.46 (48.37 - 84.25)	0.49 (0.47 - 0.51)	9.82 (4.38 - 19.09)
2014-07-16	3.89	0.23	1.20	0.07	2.69	0.30	2.33	0.14	0.23	0.01	2.10	0.15	1.14	0.07	0.14	0.01	0.99	0.07	0.58	0.03	0.10	0.01	0.48	0.04	2343	500	29.61	0.98	-2.36	0.15	3.84	0.21	95.9	49852.16	31.254	9.67 (6.36 - 15.05)	79.43 (63.63 - 93.31)	288.49 (128.11 - 556.80)	401.84 (236.13 - 657.34)	2.69 (2.53 - 2.85)	40.38 (22.44 - 57.53)	81.27 (39.39 - 130.66)	215.09 (172.45 - 257.44)	2.10 (2.01 - 2.19)	14.81 (4.88 - 33.25)	34.42 (10.73 - 79.94)	246.97 (198.76 - 294.13)	0.99 (0.95 - 1.04)	8.39 (3.51 - 16.63)
2014-07-26	3.16	0.18	0.90	0.05	2.26	0.24	1.51	0.09	0.11	0.01	1.41	0.09	0.70	0.04	0.08	0.00	0.62	0.04	0.34	0.02	0.09	0.01	0.25	0.03	2108	500	29.99	0.96	-1.49	0.72	5.29	0.38	49.2	47166.16	23.957	10.75 (7.41 - 17.09)	90.86 (81.62 - 99.68)	170.37 (91.40 - 314.67)	198.90 (118.13 - 335.87)	2.26 (2.14 - 2.39)	61.80 (46.26 - 80.82)	47.40 (28.73 - 71.74)	79.11 (60.31 - 99.50)	1.41 (1.35 - 1.46)	30.77 (13.22 - 63.49)	21.03 (8.27 - 45.89)	72.13 (55.16 - 90.44)	0.62 (0.60 - 0.65)	18.16 (9.62 - 33.51)
2014-07-27	2.86	0.17	1.02	0.06	1.84	0.23	1.48	0.09	0.16	0.01	1.33	0.10	0.70	0.04	0.08	0.00	0.62	0.05	0.35	0.02	0.10	0.01	0.25	0.03	2236	500	30.02	0.88	-2.02	0.48	6.33	0.59	64.0	38947.00	24.880	7.40 (4.96 - 11.63)	84.42 (71.47 - 96.08)	185.21 (92.31 - 347.11)	237.29 (143.08 - 390.59)	1.84 (1.72 - 1.96)	48.44 (31.21 - 66.14)	51.90 (28.83 - 80.32)	112.08 (89.90 - 135.39)	1.33 (1.27 - 1.38)	19.87 (7.48 - 42.82)	22.49 (8.09 - 50.31)	118.86 (95.86 - 142.61)	0.62 (0.59 - 0.65)	11.30 (5.30 - 21.66)
2014-07-30	3.23	0.19	0.83	0.05	2.40	0.24	1.67	0.10	0.21	0.01	1.47	0.11	0.83	0.05	0.08	0.00	0.74	0.05	0.41	0.02	0.07	0.00	0.34	0.03	2270	500	30.56	0.73	-1.60	0.17	4.08	0.24	83.7	48482.30	36.874	11.55 (7.98 - 18.33)	91.33 (82.40 - 99.98)	302.72 (174.22 - 541.94)	349.08 (223.42 - 571.07)	2.40 (2.27 - 2.53)	62.98 (47.58 - 82.16)	84.63 (55.99 - 120.94)	137.17 (113.43 - 161.20)	1.47 (1.40 - 1.53)	31.91 (13.85 - 65.65)	37.88 (15.86 - 79.89)	123.27 (102.18 - 144.36)	0.74 (0.71 - 0.78)	16.47 (8.80 - 30.28)
2014-08-07	3.44	0.20	1.03	0.06	2.41	0.26	1.52	0.09	0.22	0.01	1.30	0.10	0.66	0.04	0.12	0.01	0.54	0.05	0.36	0.02	0.09	0.01	0.27	0.03	2228	500	30.08	1.05	-2.37	0.39	4.60	0.65	81.2	66021.88	35.339	12.81 (8.82 - 20.61)	94.61 (87.24 - 101.86)	425.50 (236.05 - 772.34)	470.61 (281.85 - 794.91)	2.41 (2.27 - 2.55)	72.06 (56.79 - 93.13)	118.90 (75.01 - 174.53)	168.39 (129.35 - 208.42)	1.30 (1.24 - 1.36)	41.98 (18.69 - 85.31)	52.81 (21.34 - 113.33)	134.00 (103.25 - 165.22)	0.54 (0.52 - 0.57)	26.21 (14.38 - 47.78)
2014-08-08	4.24	0.25	1.08	0.06	3.16	0.31	1.34	0.08	0.20	0.01	1.15	0.09	0.41	0.02	0.11	0.01	0.31	0.03	0.29	0.02	0.13	0.01	0.17	0.02	2393	500	31.00	1.01	-0.68	0.51	3.15	0.29	73.8	45097.94	31.082	20.87 (14.22 - 34.36)	100.57 (96.07 - 105.48)	344.82 (194.05 - 626.35)	350.46 (204.60 - 612.28)	3.16 (2.99 - 3.33)	95.17 (79.28 - 122.82)	95.68 (61.50 - 141.12)	99.55 (74.54 - 127.57)	1.15 (1.09 - 1.20)	85.12 (39.32 - 170.64)	43.01 (17.74 - 91.95)	52.93 (39.67 - 67.71)	0.31 (0.29 - 0.32)	82.75 (46.79 - 149.01)
2014-08-10	4.64	0.27	0.65	0.04	3.99	0.31	3.11	0.18	0.10	0.01	3.01	0.19	1.64	0.09	0.06	0.00	1.57	0.10	0.76	0.04	0.05	0.00	0.72	0.05	2310	500	29.11	0.96	-1.35	0.38	2.41	0.43	103.3	27262.90	32.223	15.13 (10.34 - 23.38)	81.68 (67.90 - 94.36)	294.91 (142.16 - 561.98)	395.81 (233.71 - 653.91)	3.99 (3.81 - 4.17)	44.08 (27.64 - 60.68)	82.49 (44.24 - 130.33)	198.78 (154.29 - 246.52)	3.01 (2.89 - 3.13)	17.17 (6.40 - 36.94)	35.63 (12.41 - 80.90)	220.22 (171.01 - 272.75)	1.57 (1.51 - 1.64)	8.71 (4.08 - 16.66)
2014-08-21	2.17	0.13	0.94	0.05	1.23	0.18	1.17	0.07	0.09	0.01	1.08	0.07	0.59	0.03	0.06	0.00	0.52	0.04	0.31	0.02	0.05	0.00	0.26	0.02	2097	500	29.20	0.78	-1.85	0.68	9.74	0.10	54.2	77168.78	28.415	3.63 (2.06 - 5.77)	70.44 (46.35 - 89.42)	69.28 (13.78 - 152.79)	117.04 (59.51 - 198.90)	1.23 (1.14 - 1.33)	27.38 (6.50 - 45.49)	19.39 (4.14 - 36.94)	77.08 (61.27 - 93.78)	1.08 (1.03 - 1.12)	8.42 (0.96 - 22.00)	7.82 (0.86 - 21.29)	99.43 (79.81 - 119.61)	0.52 (0.50 - 0.55)	4.78 (0.86 - 10.88)
2014-09-09	2.77	0.16	1.24	0.07	1.53	0.23	1.42	0.08	0.30	0.02	1.11	0.10	0.66	0.04	0.15	0.01	0.51	0.05	0.32	0.02	0.14	0.01	0.18	0.03	1910	500	27.96	0.82	-1.70	0.26	4.33	0.37	73.8	35428.34	32.695	6.07 (3.94 - 9.64)	84.07 (70.15 - 96.05)	111.37 (50.62 - 214.87)	144.39 (82.15 - 243.15)	1.53 (1.41 - 1.65)	47.48 (28.68 - 65.88)	31.21 (15.60 - 50.41)	69.97 (54.44 - 86.04)	1.11 (1.06 - 1.17)	19.04 (6.60 - 42.10)	13.35 (4.34 - 30.85)	75.01 (58.82 - 91.34)	0.51 (0.48 - 0.53)	11.14 (4.89 - 21.84)
2014-10-10	2.46	0.14	0.94	0.05	1.52	0.20	1.31	0.08	0.07	0.00	1.24	0.08	0.65	0.04	0.19	0.01	0.46	0.05	0.33	0.02	0.10	0.01	0.23	0.02	1490	500	26.00	0.93	-2.25	0.59	9.61	0.40	66.5	65484.68	31.071	5.07 (3.17 - 7.94)	76.04 (57.34 - 91.61)	101.35 (33.75 - 212.44)	152.90 (78.21 - 263.14)	1.52 (1.42 - 1.62)	35.29 (16.02 - 52.80)	28.32 (10.16 - 50.92)	90.12 (66.61 - 114.19)	1.24 (1.19 - 1.29)	12.07 (3.16 - 28.42)	11.75 (2.65 - 29.88)	108.59 (80.69 - 136.59)	0.46 (0.43 - 0.49)	8.79 (3.04 - 18.27)
2014-10-17	4.75	0.28	2.63	0.15	2.12	0.43	2.31	0.13	0.47	0.03	1.84	0.16	1.25	0.07	0.22	0.01	1.02	0.09	0.56	0.03	0.12	0.01	0.44	0.04	1545	500	25.01	0.61	-0.07	0.18	4.82	0.14	86.1	64920.62	39.902	6.30 (3.19 - 10.40)	72.82 (47.15 - 91.99)	50.73 (4.61 - 121.74)	86.06 (36.54 - 156.77)	2.12 (1.91 - 2.33)	27.75 (4.04 - 47.86)	14.07 (1.56 - 29.67)	57.68 (42.98 - 73.26)	1.84 (1.75 - 1.93)	8.46 (0.37 - 23.48)	5.61 (0.19 - 16.67)	74.44 (56.36 - 92.74)	1.02 (0.97 - 1.07)	4.25 (0.40 - 10.18)
2014-10-26	5.14	0.30	2.82	0.16	2.32	0.46	2.81	0.16	0.71	0.04	2.10	0.20	1.29	0.08	0.29	0.02	1.00	0.09	0.64	0.04	0.25	0.01	0.39	0.05	2033	500	24.43	0.62	1.19	0.26	3.40	0.14	118.1	40397.44	40.420	6.31 (2.90 - 10.55)	69.49 (39.93 - 91.45)	10.53 (-1.95 - 35.76)	22.64 (4.38 - 51.33)	2.32 (2.09 - 2.55)	22.56 (-0.61 - 43.06)	2.81 (-0.33 - 8.76)	18.67 (10.02 - 28.71)	2.10 (1.99 - 2.22)	6.45 (-0.59 - 19.81)	1.10 (-0.22 - 4.70)	25.14 (13.59 - 38.30)	1.00 (0.95 - 1.05)	3.85 (-0.32 - 10.04)
2014-10-27	3.81	0.22	1.90	0.11	1.91	0.33	1.96	0.11	0.35	0.02	1.61	0.13	0.84	0.05	0.27	0.02	0.57	0.06	0.41	0.02	0.15	0.01	0.26	0.03	1383	500	24.27	1.13	-1.78	0.73	6.62	0.40	118.1	95702.18	52.483	6.02 (3.41 - 9.67)	74.34 (52.17 - 91.64)	127.04 (21.68 - 301.44)	206.87 (84.52 - 386.61)	1.91 (1.74 - 2.08)	31.59 (9.65 - 50.51)	35.18 (6.59 - 73.46)	133.46 (90.02 - 179.98)	1.61 (1.53 - 1.68)	10.18 (1.60 - 25.87)	14.19 (1.40 - 41.34)	166.43 (113.16 - 221.84)	0.57 (0.54 - 0.61)	7.84 (1.80 - 17.42)
2014-11-30	5.03	0.29	1.96	0.11	3.08	0.41	3.35	0.19	0.40	0.02	2.94	0.22	1.58	0.09	0.35	0.02	1.23	0.11	0.74	0.04	0.21	0.01	0.52	0.05	1872	500	19.88	0.68	-0.69	0.57	8.94	0.81	64.0	72038.52	30.411	7.43 (3.50 - 12.02)	61.19 (27.82 - 86.83)	79.73 (-23.85 - 223.23)	186.04 (75.06 - 334.74)	3.08 (2.86 - 3.29)	16.15 (-3.33 - 34.69)	21.71 (-4.32 - 54.55)	154.61 (117.68 - 194.01)	2.94 (2.81 - 3.08)	4.30 (-1.26 - 14.49)	8.37 (-2.50 - 30.18)	218.16 (166.90 - 271.72)	1.23 (1.17 - 1.30)	2.96 (-0.89 - 8.38)
2015-02-20	5.49	0.32	2.76	0.16	2.74	0.48	3.13	0.18	0.88	0.05	2.25	0.23	1.43	0.08	0.73	0.04	0.70	0.13	0.69	0.04	0.31	0.02	0.38	0.06	1639	500	17.01	0.59	-0.59	0.50	9.63	0.59	152.7	161724.06	87.924	9.01 (5.20 - 14.49)	76.48 (55.72 - 92.71)	325.33 (75.53 - 729.38)	500.65 (222.76 - 905.47)	2.74 (2.50 - 2.98)	34.46 (12.29 - 53.57)	90.49 (22.60 - 177.22)	304.09 (215.21 - 397.24)	2.25 (2.12 - 2.37)	11.47 (2.20 - 28.61)	36.77 (5.40 - 101.23)	369.52 (263.47 - 477.37)	0.70 (0.64 - 0.76)	10.13 (2.72 - 22.16)
2015-03-24	15.15	0.88	8.03	0.47	7.12	1.34	9.67	0.56	3.27	0.19	6.39	0.75	3.98	0.23	1.54	0.09	2.44	0.32	1.67	0.10	0.67	0.04	1.00	0.14	1210	500	22.60	0.80	1.94	0.77	5.54	0.70	120.6	63416.46	54.876	19.80 (9.45 - 32.88)	70.31 (41.53 - 91.57)	18.43 (-18.67 - 118.71)	48.41 (-9.97 - 181.57)	7.12 (6.45 - 7.79)	23.81 (0.36 - 44.36)	4.70 (-3.90 - 28.87)	48.40 (3.12 - 112.05)	6.39 (6.00 - 6.79)	6.92 (-0.32 - 20.78)	1.82 (-2.16 - 14.98)	64.40 (4.16 - 148.16)	2.44 (2.27 - 2.60)	5.13 (-0.15 - 13.09)
2015-03-25	6.64	0.39	4.33	0.25	2.31	0.64	3.47	0.20	1.24	0.07	2.22	0.27	1.56	0.09	0.88	0.05	0.68	0.14	0.74	0.04	0.36	0.02	0.38	0.06	1086	500	22.43	0.77	-1.81	0.30	6.18	1.09	41.8	43056.58	19.762	5.45 (1.20 - 10.17)	70.89 (33.61 - 99.26)	15.44 (-19.63 - 72.96)	44.00 (2.16 - 107.45)	2.31 (2.00 - 2.62)	14.67 (-13.53 - 39.22)	3.96 (-4.25 - 17.83)	43.27 (25.54 - 62.50)	2.22 (2.08 - 2.37)	3.76 (-4.13 - 16.91)	1.50 (-2.22 - 9.42)	62.87 (37.80 - 88.25)	0.68 (0.61 - 0.75)	3.71 (-3.88 - 13.64)
2015-03-29	3.97	0.23	2.91	0.17	1.05	0.40	2.08	0.12	0.70	0.04	1.39	0.16	1.07	0.06	0.39	0.02	0.68	0.09	0.49	0.03	0.18	0.01	0.32	0.04	1237	500	20.60	0.85	-1.78	0.39	9.95	0.52	78.8	94332.32	36.094	0.18 (-3.12 - 2.76)	104.46 (23.23 - 168.22)	-47.03 (-163.34 - 20.59)	3.06 (-83.91 - 76.62)	1.05 (0.86 - 1.24)	-27.67 (-85.17 - 7.23)	-12.64 (-40.50 - 4.01)	56.88 (36.53 - 79.94)	1.39 (1.30 - 1.47)	-5.29 (-19.39 - 2.41)	-4.76 (-21.20 - 2.29)	115.44 (78.77 - 151.92)	0.68 (0.63 - 0.72)	-3.20 (-10.15 - 1.34)
2015-03-30	5.24	0.30	2.31	0.13	2.93	0.44	3.10	0.18	0.32	0.02	2.78	0.20	1.55	0.09	0.39	0.02	1.16	0.11	0.70	0.04	0.24	0.01	0.46	0.05	1399	500	22.74	0.77	-0.26	0.54	5.33	0.86	66.4	59629.20	33.402	7.24 (3.39 - 11.80)	62.87 (30.34 - 87.82)	31.03 (-8.41 - 98.31)	74.47 (22.52 - 150.17)	2.93 (2.71 - 3.16)	17.30 (-2.84 - 36.14)	8.32 (-1.51 - 24.01)	64.32 (41.43 - 90.00)	2.78 (2.66 - 2.90)	4.66 (-1.15 - 15.33)	3.24 (-0.91 - 13.02)	90.03 (58.29 - 125.17)	1.16 (1.10 - 1.22)	3.22 (-0.80 - 8.93)
2015-03-31	5.31	0.31	2.33	0.13	2.99	0.44	2.49	0.14	0.42	0.02	2.07	0.17	0.99	0.06	0.73	0.04	0.26	0.10	0.49	0.03	0.29	0.02	0.20	0.04	2028	500	22.93	0.56	0.38	0.38	7.06	0.16	61.6	36690.76	25.748	12.57 (8.31 - 20.01)	86.48 (74.26 - 97.34)	167.13 (82.91 - 315.43)	207.91 (122.78 - 348.12)	2.99 (2.76 - 3.21)	52.10 (34.24 - 70.63)	46.72 (25.85 - 72.97)	93.58 (73.91 - 114.71)	2.07 (1.97 - 2.16)	22.30 (8.42 - 48.26)	20.31 (7.28 - 45.63)	95.48 (76.10 - 115.91)	0.26 (0.21 - 0.30)	48.99 (22.14 - 99.04)
2015-04-01	5.39	0.31	2.54	0.15	2.85	0.46	3.28	0.19	0.48	0.03	2.80	0.22	1.60	0.09	0.43	0.02	1.18	0.12	0.73	0.04	0.21	0.01	0.52	0.05	1535	500	21.89	0.68	2.14	1.05	10.19	0.54	49.3	50845.98	27.113	6.45 (2.47 - 10.84)	60.40 (22.92 - 89.33)	14.43 (-12.59 - 62.48)	45.82 (8.79 - 104.67)	2.85 (2.62 - 3.09)	12.73 (-8.02 - 32.37)	3.75 (-2.63 - 15.14)	46.08 (26.25 - 70.05)	2.80 (2.67 - 2.93)	3.23 (-2.58 - 13.04)	1.44 (-1.40 - 8.10)	66.91 (38.28 - 101.13)	1.18 (1.11 - 1.24)	2.29 (-1.77 - 7.60)
2015-04-02	4.59	0.27	2.01	0.12	2.59	0.38	2.59	0.15	0.30	0.02	2.29	0.17	1.32	0.08	0.42	0.02	0.89	0.10	0.61	0.04	0.22	0.01	0.39	0.05	1215	500	24.32	1.00	-0.76	0.39	6.90	0.91	113.2	98764.22	69.405	7.41 (4.10 - 11.81)	69.24 (43.85 - 89.07)	93.86 (5.66 - 240.25)	174.47 (64.83 - 330.26)	2.59 (2.39 - 2.78)	25.66 (4.65 - 43.98)	25.76 (2.04 - 58.86)	126.44 (83.12 - 171.96)	2.29 (2.19 - 2.39)	7.73 (0.57 - 20.78)	10.28 (0.19 - 32.59)	165.64 (109.24 - 223.31)	0.89 (0.84 - 0.94)	5.52 (0.73 - 12.89)
2015-04-07	3.92	0.23	1.39	0.08	2.53	0.31	2.19	0.13	0.18	0.01	2.00	0.14	1.13	0.07	0.56	0.03	0.58	0.10	0.53	0.03	0.28	0.02	0.25	0.05	1274	500	23.82	0.79	-1.46	0.62	10.26	0.34	66.5	54794.40	31.857	8.87 (5.72 - 13.86)	78.33 (61.58 - 92.78)	143.72 (45.12 - 307.56)	211.18 (96.00 - 377.45)	2.53 (2.37 - 2.69)	38.65 (20.16 - 55.97)	40.10 (13.53 - 74.16)	120.77 (80.05 - 161.69)	2.01 (1.92 - 2.09)	13.87 (4.22 - 31.55)	16.56 (3.56 - 42.99)	141.00 (93.82 - 187.84)	0.58 (0.53 - 0.63)	12.94 (5.06 - 26.24)
2015-04-08	3.68	0.21	1.50	0.09	2.18	0.30	1.88	0.11	0.10	0.01	1.78	0.12	1.07	0.06	0.33	0.02	0.74	0.08	0.50	0.03	0.16	0.01	0.34	0.04	1212	500	23.86	0.83	-1.64	0.34	9.85	0.85	78.7	55224.16	35.005	7.26 (4.50 - 11.40)	75.98 (57.06 - 91.71)	122.62 (29.06 - 278.08)	191.11 (78.76 - 351.28)	2.18 (2.03 - 2.34)	35.11 (15.56 - 52.75)	34.08 (8.72 - 67.67)	117.48 (75.59 - 159.46)	1.78 (1.71 - 1.86)	11.97 (3.04 - 28.30)	13.91 (2.14 - 38.44)	141.89 (91.69 - 191.20)	0.74 (0.69 - 0.78)	7.85 (2.64 - 16.38)
2015-05-02	7.97	0.46	2.48	0.14	5.49	0.61	5.31	0.31	0.37	0.02	4.94	0.33	2.38	0.14	0.17	0.01	2.21	0.15	1.68	0.10	0.09	0.01	1.59	0.10	1974	500	21.80	0.52	-0.60	0.41	1.81	0.39	100.9	28793.92	32.019	15.30 (8.79 - 23.86)	66.80 (41.24 - 87.14)	100.33 (14.61 - 237.80)	185.98 (87.82 - 330.55)	5.49 (5.16 - 5.82)	24.08 (4.50 - 41.42)	27.72 (4.56 - 57.63)	132.30 (96.00 - 173.77)	4.94 (4.73 - 5.15)	7.12 (0.56 - 19.05)	11.24 (0.80 - 32.76)	175.17 (127.32 - 229.10)	2.21 (2.11 - 2.30)	4.42 (0.61 - 10.24)
2015-06-02	5.83	0.34	1.13	0.07	4.70	0.40	3.22	0.19	0.23	0.01	2.99	0.20	1.47	0.09	0.13	0.01	1.34	0.09	0.71	0.04	0.08	0.00	0.63	0.05	1772	500	25.63	0.44	0.09	0.52	2.16	0.28	103.3	25248.40	28.931	21.81 (15.15 - 34.45)	89.98 (80.47 - 99.18)	129.91 (49.02 - 271.91)	156.50 (64.19 - 300.09)	4.70 (4.46 - 4.93)	59.80 (44.47 - 78.29)	36.02 (14.82 - 64.93)	65.28 (36.93 - 98.47)	2.99 (2.86 - 3.12)	29.03 (12.51 - 59.78)	15.24 (4.11 - 38.26)	61.03 (34.55 - 91.97)	1.34 (1.28 - 1.39)	17.00 (9.01 - 31.28)
2015-06-03	4.09	0.24	1.37	0.08	2.72	0.32	2.20	0.13	0.23	0.01	1.97	0.14	1.12	0.06	0.10	0.01	1.02	0.07	0.54	0.03	0.08	0.00	0.46	0.04	1812	500	26.46	0.56	-1.27	0.35	2.17	0.16	68.9	22159.50	25.897	10.83 (7.27 - 16.99)	84.08 (70.99 - 95.88)	108.76 (52.51 - 207.39)	140.65 (81.98 - 235.28)	2.72 (2.55 - 2.89)	47.83 (30.65 - 65.42)	30.36 (16.30 - 48.14)	67.05 (51.89 - 83.37)	1.97 (1.88 - 2.06)	19.48 (7.28 - 42.01)	13.16 (4.59 - 29.88)	71.54 (55.64 - 88.50)	1.02 (0.98 - 1.07)	9.93 (4.65 - 19.04)
2015-06-10	5.05	0.29	0.96	0.06	4.09	0.35	2.60	0.15	0.10	0.01	2.50	0.16	1.32	0.08	0.09	0.01	1.23	0.08	0.61	0.04	0.06	0.00	0.55	0.04	1536	500	26.12	0.71	-2.54	0.31	2.96	0.21	110.7	47300.46	45.348	19.68 (13.70 - 31.17)	91.31 (82.49 - 99.94)	530.53 (291.40 - 963.28)	614.88 (372.35 - 1021.61)	4.09 (3.89 - 4.29)	63.00 (47.96 - 81.95)	148.24 (92.43 - 218.47)	242.99 (188.01 - 298.52)	2.50 (2.40 - 2.60)	31.99 (14.01 - 65.44)	65.54 (26.19 - 141.12)	218.20 (169.11 - 267.57)	1.23 (1.18 - 1.28)	16.98 (9.16 - 31.05)
2015-06-11	2.57	0.15	1.19	0.07	1.38	0.22	1.36	0.08	0.32	0.02	1.04	0.10	0.71	0.04	0.21	0.01	0.50	0.05	0.32	0.02	0.14	0.01	0.18	0.03	1970	500	25.65	0.37	-2.00	0.48	5.37	0.18	56.6	29384.84	26.516	5.19 (3.29 - 8.27)	82.08 (66.53 - 95.07)	87.67 (37.56 - 171.95)	117.43 (66.44 - 197.82)	1.38 (1.27 - 1.49)	43.84 (24.11 - 62.31)	24.60 (11.52 - 40.50)	59.60 (47.07 - 72.99)	1.04 (0.98 - 1.09)	16.66 (5.24 - 37.83)	10.43 (3.13 - 24.54)	66.21 (52.79 - 80.20)	0.50 (0.47 - 0.53)	9.31 (3.75 - 18.67)
2015-06-26	3.58	0.21	0.88	0.05	2.70	0.26	2.06	0.12	0.21	0.01	1.84	0.13	1.02	0.06	0.24	0.01	0.78	0.07	0.48	0.03	0.11	0.01	0.36	0.03	1415	500	26.68	0.77	-1.23	0.52	5.29	0.17	73.8	59870.94	34.865	11.58 (7.97 - 18.18)	87.09 (75.94 - 97.54)	164.68 (76.74 - 318.08)	205.69 (110.00 - 354.99)	2.70 (2.55 - 2.84)	53.51 (37.48 - 71.24)	46.03 (23.67 - 74.39)	92.51 (65.05 - 121.08)	1.84 (1.76 - 1.93)	23.63 (9.67 - 49.72)	19.79 (6.68 - 45.65)	93.00 (65.45 - 121.35)	0.78 (0.74 - 0.82)	14.72 (7.44 - 27.59)
2015-06-29	3.36	0.19	0.95	0.05	2.41	0.25	2.32	0.13	0.16	0.01	2.16	0.14	1.27	0.07	0.13	0.01	1.13	0.08	0.55	0.03	0.13	0.01	0.42	0.04	1570	500	26.27	0.70	-0.88	0.53	4.33	0.55	56.6	33198.96	23.773	6.79 (3.98 - 10.54)	67.17 (42.35 - 87.17)	41.43 (6.34 - 97.51)	76.35 (35.42 - 135.19)	2.41 (2.28 - 2.55)	24.67 (5.31 - 41.81)	11.45 (1.95 - 23.68)	54.15 (38.97 - 70.74)	2.16 (2.07 - 2.25)	7.41 (0.76 - 19.40)	4.64 (0.37 - 13.45)	71.27 (51.41 - 92.81)	1.13 (1.08 - 1.18)	3.89 (0.65 - 8.85)
2015-06-30	4.63	0.27	1.01	0.06	3.62	0.33	2.87	0.17	0.24	0.01	2.63	0.18	1.28	0.07	0.18	0.01	1.10	0.08	0.52	0.03	0.18	0.01	0.34	0.04	1246	500	24.65	0.43	-1.10	0.65	7.84	0.64	37.0	14235.80	14.271	14.39 (9.84 - 22.38)	83.86 (71.10 - 95.66)	109.33 (45.77 - 218.29)	144.43 (72.55 - 252.83)	3.62 (3.43 - 3.80)	47.58 (31.19 - 64.65)	30.55 (13.96 - 51.72)	70.91 (47.92 - 94.81)	2.63 (2.52 - 2.75)	19.38 (7.48 - 41.34)	12.93 (3.88 - 30.99)	75.83 (51.32 - 101.22)	1.10 (1.05 - 1.15)	12.26 (5.92 - 23.26)
2015-07-01	4.61	0.27	1.30	0.08	3.31	0.34	3.34	0.19	0.65	0.04	2.68	0.23	1.70	0.10	0.26	0.01	1.44	0.11	0.72	0.04	0.17	0.01	0.55	0.05	1317	500	23.90	0.31	0.79	0.55	5.96	0.57	29.6	16733.78	12.182	11.22 (7.24 - 17.37)	76.61 (58.77 - 91.75)	25.04 (7.94 - 54.97)	37.85 (17.46 - 69.11)	3.31 (3.12 - 3.50)	36.34 (17.73 - 53.55)	6.92 (2.38 - 13.21)	22.02 (14.44 - 30.76)	2.68 (2.55 - 2.81)	12.66 (3.62 - 29.21)	2.90 (0.64 - 7.65)	26.21 (17.21 - 36.55)	1.44 (1.38 - 1.51)	6.34 (2.37 - 12.84)
2015-07-07	2.91	0.17	0.77	0.04	2.13	0.21	1.57	0.09	0.08	0.00	1.50	0.10	0.75	0.04	0.11	0.01	0.64	0.05	0.40	0.02	0.07	0.00	0.33	0.03	1713	500	26.01	0.52	-3.33	0.48	10.41	0.06	56.6	43647.50	28.628	8.87 (6.08 - 13.90)	85.79 (74.01 - 96.79)	252.54 (118.82 - 483.54)	321.33 (176.82 - 544.00)	2.13 (2.02 - 2.25)	51.06 (34.82 - 68.49)	70.95 (36.68 - 113.09)	150.03 (108.65 - 190.65)	1.50 (1.44 - 1.56)	21.82 (8.75 - 46.07)	30.45 (10.32 - 69.64)	154.88 (112.39 - 196.21)	0.64 (0.61 - 0.67)	13.45 (6.67 - 25.35)
2015-07-08	2.43	0.14	0.81	0.05	1.62	0.19	1.33	0.08	0.16	0.01	1.16	0.09	0.65	0.04	0.13	0.01	0.52	0.04	0.32	0.02	0.10	0.01	0.21	0.02	1953	500	27.01	0.69	-2.62	0.49	10.30	0.25	49.2	47542.20	22.351	6.51 (4.38 - 10.22)	84.49 (71.63 - 96.12)	163.07 (77.73 - 310.89)	210.46 (121.07 - 351.59)	1.62 (1.52 - 1.72)	48.56 (31.41 - 66.18)	45.71 (24.02 - 72.39)	100.73 (77.07 - 124.56)	1.16 (1.11 - 1.22)	19.94 (7.52 - 42.96)	19.67 (6.75 - 44.73)	106.77 (81.94 - 131.33)	0.52 (0.50 - 0.55)	11.78 (5.56 - 22.54)
2015-07-13	3.96	0.23	0.93	0.05	3.03	0.28	2.27	0.13	0.16	0.01	2.11	0.14	1.21	0.07	0.15	0.01	1.06	0.08	0.55	0.03	0.12	0.01	0.42	0.04	1707	500	28.42	0.80	-0.23	0.53	4.44	0.33	86.1	45554.56	37.963	12.69 (8.72 - 19.86)	86.09 (74.45 - 96.93)	155.18 (76.65 - 296.34)	195.38 (111.16 - 332.54)	3.03 (2.87 - 3.19)	51.62 (35.49 - 69.01)	43.12 (23.74 - 68.70)	88.32 (65.14 - 114.20)	2.11 (2.02 - 2.20)	22.21 (8.97 - 46.72)	18.86 (6.83 - 42.68)	90.52 (66.88 - 116.82)	1.06 (1.01 - 1.11)	11.66 (5.84 - 21.90)
2015-07-14	2.65	0.15	0.70	0.04	1.96	0.19	1.56	0.09	0.10	0.01	1.47	0.10	0.78	0.05	0.14	0.01	0.64	0.05	0.38	0.02	0.10	0.01	0.28	0.03	1559	500	28.70	0.92	-0.30	0.33	4.77	0.37	64.0	36610.18	28.609	7.47 (5.04 - 11.61)	82.07 (68.20 - 94.68)	63.85 (28.28 - 125.30)	86.02 (47.07 - 146.21)	1.96 (1.85 - 2.06)	44.60 (27.66 - 61.63)	17.84 (8.68 - 29.47)	43.51 (31.85 - 55.82)	1.47 (1.40 - 1.53)	17.43 (6.38 - 37.83)	7.63 (2.43 - 17.89)	47.94 (35.18 - 61.35)	0.64 (0.61 - 0.67)	10.56 (4.86 - 20.37)
2015-07-19	2.37	0.14	1.03	0.06	1.33	0.20	1.36	0.08	0.16	0.01	1.19	0.09	0.68	0.04	0.13	0.01	0.55	0.05	0.30	0.02	0.10	0.01	0.21	0.02	1586	500	28.64	0.89	-2.56	0.52	4.96	0.31	64.0	41498.70	29.684	3.72 (2.01 - 5.94)	68.09 (41.44 - 88.72)	43.08 (2.92 - 105.62)	80.18 (34.40 - 144.46)	1.33 (1.23 - 1.43)	24.18 (3.12 - 42.58)	11.88 (1.05 - 25.78)	57.98 (42.19 - 74.46)	1.19 (1.14 - 1.25)	7.13 (0.26 - 19.77)	4.74 (0.09 - 14.44)	76.86 (56.26 - 97.71)	0.55 (0.52 - 0.58)	4.32 (0.37 - 10.33)
2015-07-20	3.19	0.18	0.95	0.05	2.24	0.24	1.83	0.11	0.19	0.01	1.64	0.12	0.94	0.05	0.16	0.01	0.78	0.06	0.44	0.03	0.11	0.01	0.33	0.03	1438	500	28.67	1.01	-1.74	0.45	4.34	0.10	73.8	43942.96	35.083	8.81 (5.93 - 13.77)	83.46 (70.21 - 95.55)	121.03 (51.76 - 239.16)	160.24 (83.89 - 276.52)	2.24 (2.11 - 2.37)	46.80 (29.79 - 64.13)	33.83 (15.83 - 56.50)	79.50 (56.13 - 103.45)	1.64 (1.57 - 1.71)	18.78 (7.01 - 40.62)	14.39 (4.42 - 34.07)	85.71 (60.70 - 111.16)	0.78 (0.74 - 0.82)	10.53 (4.91 - 20.20)
2015-07-22	2.59	0.15	0.99	0.06	1.60	0.21	1.45	0.08	0.19	0.01	1.26	0.10	0.72	0.04	0.14	0.01	0.58	0.05	0.34	0.02	0.14	0.01	0.20	0.03	1719	500	27.97	0.90	-2.62	0.23	5.60	0.33	73.8	54176.62	34.113	5.66 (3.62 - 8.87)	78.80 (62.00 - 93.09)	119.01 (45.84 - 239.85)	169.92 (90.96 - 287.58)	1.60 (1.49 - 1.71)	39.20 (20.32 - 56.78)	33.32 (13.90 - 57.07)	93.90 (70.65 - 117.22)	1.26 (1.20 - 1.32)	14.12 (4.25 - 32.25)	13.97 (3.75 - 33.94)	109.18 (82.54 - 135.30)	0.58 (0.55 - 0.61)	8.21 (3.20 - 16.57)
2015-07-23	2.36	0.14	0.71	0.04	1.65	0.18	1.34	0.08	0.10	0.01	1.25	0.08	0.67	0.04	0.12	0.01	0.55	0.05	0.32	0.02	0.07	0.00	0.26	0.02	1526	500	28.49	0.97	-1.83	0.65	7.49	0.20	56.6	39699.08	25.025	6.19 (4.14 - 9.66)	81.48 (67.03 - 94.38)	94.19 (37.97 - 189.28)	129.20 (66.18 - 223.34)	1.65 (1.55 - 1.74)	43.56 (26.18 - 60.71)	26.31 (11.54 - 44.93)	67.20 (47.21 - 87.60)	1.25 (1.19 - 1.30)	16.75 (5.93 - 36.74)	11.11 (3.18 - 26.89)	74.86 (52.76 - 97.22)	0.55 (0.53 - 0.58)	10.07 (4.49 - 19.57)
2015-07-25	3.02	0.18	0.89	0.05	2.13	0.23	1.70	0.10	0.15	0.01	1.55	0.11	0.80	0.05	0.12	0.01	0.68	0.05	0.39	0.02	0.10	0.01	0.29	0.03	1990	500	30.31	0.89	-0.92	0.17	2.36	0.29	100.9	43271.46	39.838	8.43 (5.69 - 13.17)	83.75 (70.65 - 95.68)	119.00 (57.92 - 225.32)	154.73 (91.23 - 256.44)	2.13 (2.00 - 2.25)	47.25 (30.33 - 64.66)	33.33 (17.99 - 52.29)	74.74 (58.35 - 91.66)	1.55 (1.49 - 1.62)	19.14 (7.20 - 41.20)	14.41 (5.04 - 32.50)	80.16 (62.75 - 97.96)	0.68 (0.65 - 0.71)	11.64 (5.48 - 22.25)
2015-08-05	2.97	0.17	0.72	0.04	2.25	0.21	1.59	0.09	0.10	0.01	1.48	0.10	0.76	0.04	0.10	0.01	0.66	0.05	0.37	0.02	0.07	0.00	0.30	0.03	2192	500	29.34	1.11	-0.82	0.58	5.21	0.30	86.1	52162.12	38.375	10.07 (6.95 - 15.89)	88.67 (78.40 - 98.46)	230.17 (122.74 - 426.97)	277.34 (166.82 - 464.34)	2.25 (2.13 - 2.37)	56.79 (41.15 - 74.93)	64.07 (38.53 - 97.26)	116.93 (90.49 - 145.78)	1.48 (1.42 - 1.54)	26.34 (11.07 - 54.80)	28.39 (11.06 - 62.11)	113.21 (87.74 - 140.77)	0.66 (0.63 - 0.69)	15.50 (8.04 - 28.80)
2015-08-06	2.70	0.16	0.69	0.04	2.01	0.20	1.46	0.08	0.10	0.01	1.36	0.09	0.70	0.04	0.08	0.00	0.62	0.05	0.32	0.02	0.07	0.00	0.25	0.02	1910	500	29.99	1.29	0.02	0.54	5.20	0.48	98.5	71769.92	39.945	8.75 (6.02 - 13.74)	87.56 (76.71 - 97.80)	143.03 (68.83 - 275.21)	176.50 (96.35 - 305.52)	2.01 (1.90 - 2.12)	54.49 (38.59 - 72.33)	39.65 (21.23 - 64.09)	77.16 (54.75 - 102.18)	1.36 (1.30 - 1.42)	24.46 (10.10 - 51.06)	17.30 (6.13 - 39.57)	76.66 (54.51 - 101.31)	0.62 (0.59 - 0.65)	14.07 (7.19 - 26.30)
2015-08-07	2.37	0.14	1.14	0.07	1.23	0.20	1.38	0.08	0.26	0.02	1.11	0.10	0.72	0.04	0.16	0.01	0.56	0.05	0.38	0.02	0.14	0.01	0.24	0.03	1778	500	30.34	1.08	-1.85	0.48	6.61	0.46	78.8	50147.62	33.582	3.39 (1.73 - 5.50)	68.21 (40.14 - 89.55)	54.30 (0.72 - 135.08)	102.17 (43.55 - 183.95)	1.23 (1.13 - 1.34)	23.23 (1.36 - 42.43)	14.99 (0.62 - 32.96)	74.33 (55.72 - 93.81)	1.11 (1.06 - 1.17)	6.75 (-0.07 - 19.51)	5.94 (-0.09 - 18.46)	99.31 (75.11 - 123.93)	0.56 (0.53 - 0.58)	3.79 (0.06 - 9.42)
2015-08-08	2.62	0.15	0.87	0.05	1.75	0.20	1.52	0.09	0.21	0.01	1.31	0.10	0.83	0.05	0.13	0.01	0.70	0.06	0.40	0.02	0.11	0.01	0.29	0.03	1833	500	30.58	1.15	-0.95	0.53	6.91	0.26	61.5	53182.80	31.368	6.63 (4.40 - 10.37)	81.93 (67.51 - 94.68)	104.78 (46.34 - 204.72)	141.09 (78.61 - 238.07)	1.75 (1.64 - 1.86)	44.16 (26.48 - 61.60)	29.27 (14.21 - 48.12)	71.68 (54.04 - 90.14)	1.31 (1.25 - 1.37)	17.07 (6.00 - 37.57)	12.51 (3.96 - 29.29)	79.38 (60.03 - 99.33)	0.70 (0.66 - 0.73)	8.58 (3.82 - 16.74)
2015-08-19	3.77	0.22	1.20	0.07	2.57	0.29	2.37	0.14	0.28	0.02	2.09	0.15	1.24	0.07	0.13	0.01	1.11	0.08	0.61	0.04	0.14	0.01	0.47	0.04	2252	500	29.47	0.95	-2.44	0.47	6.99	0.35	83.6	47918.24	34.053	8.65 (5.55 - 13.45)	76.24 (58.19 - 91.59)	276.10 (103.64 - 556.48)	409.50 (225.58 - 682.71)	2.57 (2.42 - 2.73)	35.83 (17.19 - 52.97)	77.53 (31.40 - 132.50)	236.92 (183.41 - 290.86)	2.10 (2.00 - 2.19)	12.39 (3.47 - 28.69)	32.36 (8.35 - 78.97)	283.63 (220.30 - 346.79)	1.11 (1.06 - 1.16)	6.28 (2.31 - 12.83)
[truncated: 8 more columns]
