# Supplementary material for: Quantifying alkane emissions in the Eagle Ford Shale using boundary layer enhancement
Source: Copernicus journal article supplement (doi:10.5194/acp-17-11163-2017), 2017-09-20
Supplement: Supplementary file 2 [file acp-17-11163-2017-supplement.zip]

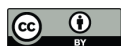

*Supplement of*

**Quantifying alkane emissions in the Eagle Ford Shale using boundary layer enhancement**

**Geoffrey Roest and Gunnar Schade**

*Correspondence to:* Geoffrey Roest ([gsroest@tamu.edu](mailto:gsroest@tamu.edu))

- [acp-17-11163-2017-supplement-title-page.pdf](#)
- [roest\\_schade\\_june2017\\_supp.pdf](#)
- [table\\_s2.xlsx](#)

The copyright of individual parts of the supplement might differ from the CC BY 3.0 License.
